# Supplementary material for: Hydrogen-induced damage in Ni-based superalloys at high temperatures
Source: Research Square preprint supplement (doi:10.21203/rs.3.rs-8168530/v1), 2025-12-02
Supplement: Supplementary file 1 [file da2daacb569af3e6f438a2de.pdf]

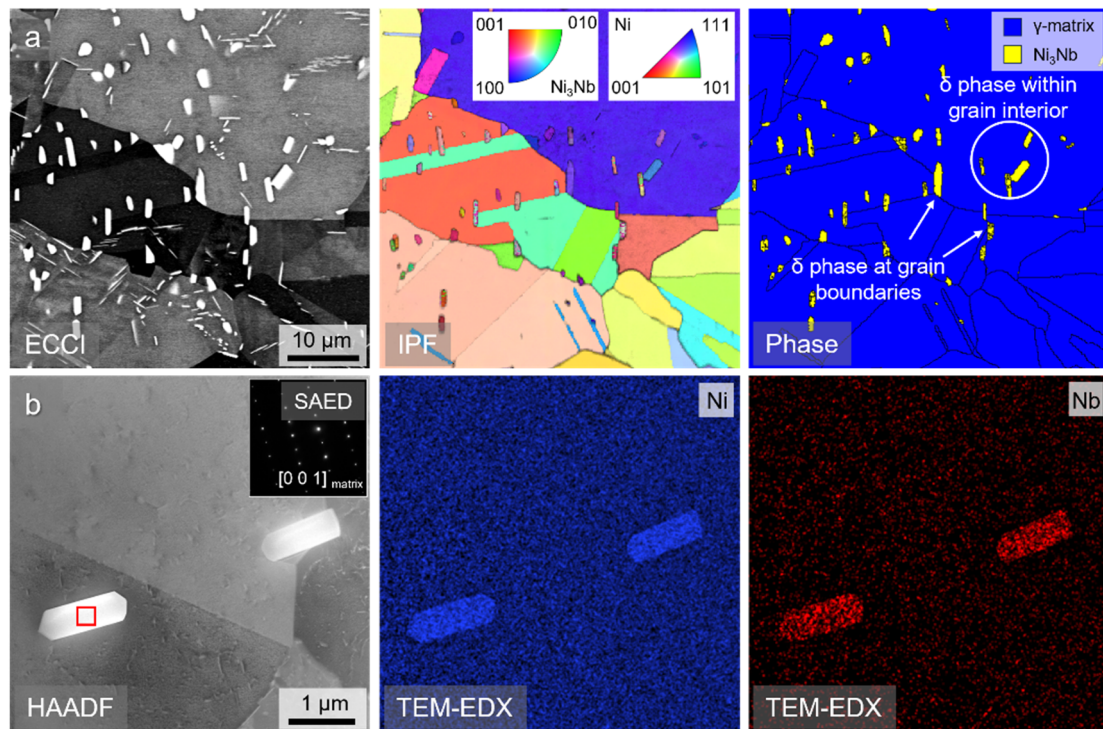

1

2 **Extended Data Fig. 1 | Distribution, morphology and structure of the  $\delta$  phase**  
 3 **within the studied material IN718. a**, Electron channeling contrast imaging (ECCI),  
 4 electron backscatter diffraction (EBSD) inverse pole figure (IPF) and phase map,  
 5 showing the distribution of the  $\delta$  phase. **b**, High-angle annular dark-field scanning  
 6 transmission electron microscopy (HAADF-STEM) image, showing the morphology  
 7 of the  $\delta$  phase. The selected area electron diffraction (SAED) pattern taken from the  
 8 marked rectangular frame is placed as the inset to reveal the crystal structure (D0<sub>a</sub>) of  
 9 the  $\delta$  phase. The corresponding energy-dispersive X-ray spectroscopy (EDX) maps of  
 10 Ni and Nb are placed on the right-hand side.

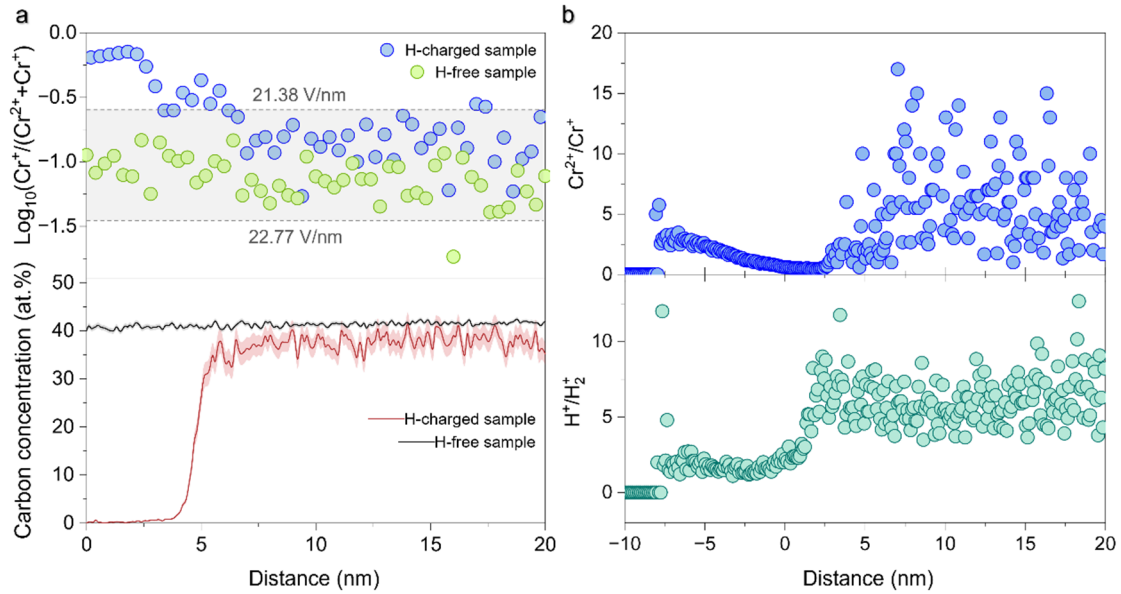

11

12 **Extended Data Fig. 2 | The local electrical field analysis of regions close to**  
 13 **carbide-matrix interfaces in APT specimens. a**, Carbon (C) detection. The relative  
 14 abundance of singly and doubly charged Cr ions plotted logarithmically within the  
 15 APT specimens taken from bulk samples before and after *in situ* tensile testing under  
 16 2 MPa H<sub>2</sub> at 400 °C. Green circles represent hydrogen (H)-free sample (data also  
 17 shown in Fig. 2c, in the manuscript, the initial state devoid of any charging or  
 18 deformation); blue circles represent *in situ* H-charged sample (data also shown in  
 19 Fig. 4g, in the manuscript, the state after H<sub>2</sub> exposure and simultaneous mechanical  
 20 loading at 400 °C). Dash lines represent the upper and lower bounds of the charge-  
 21 state ratio,  $\text{Log}_{10}^{\text{Cr}^+ / (\text{Cr}^{2+} + \text{Cr}^+)}$ . The corresponding electric fields are 21.38 V/nm and  
 22 22.77 V/nm, respectively. The respective C concentrations within individual carbides  
 23 are accordingly plotted, suggesting a reduction in C concentration after *in situ* tensile  
 24 testing under 2 MPa H<sub>2</sub> at 400 °C. The black line indicates H-free sample and red line  
 25 indicate *in situ* H-charged sample. **b**, H detection. A notably higher ratios of  $\text{Cr}^{2+}/\text{Cr}^+$   
 26 and  $\text{H}^+/\text{H}_2^+$  is observed (data also shown in Fig. 4f and Fig. 4g, in the manuscript),  
 27 despite the localized fluctuations, indicating a relatively high electric field in this  
 28 carbide phase and vice versa in the FCC matrix. This suggests that the detected H  
 29 originates intrinsically from the material, rather than external contamination.



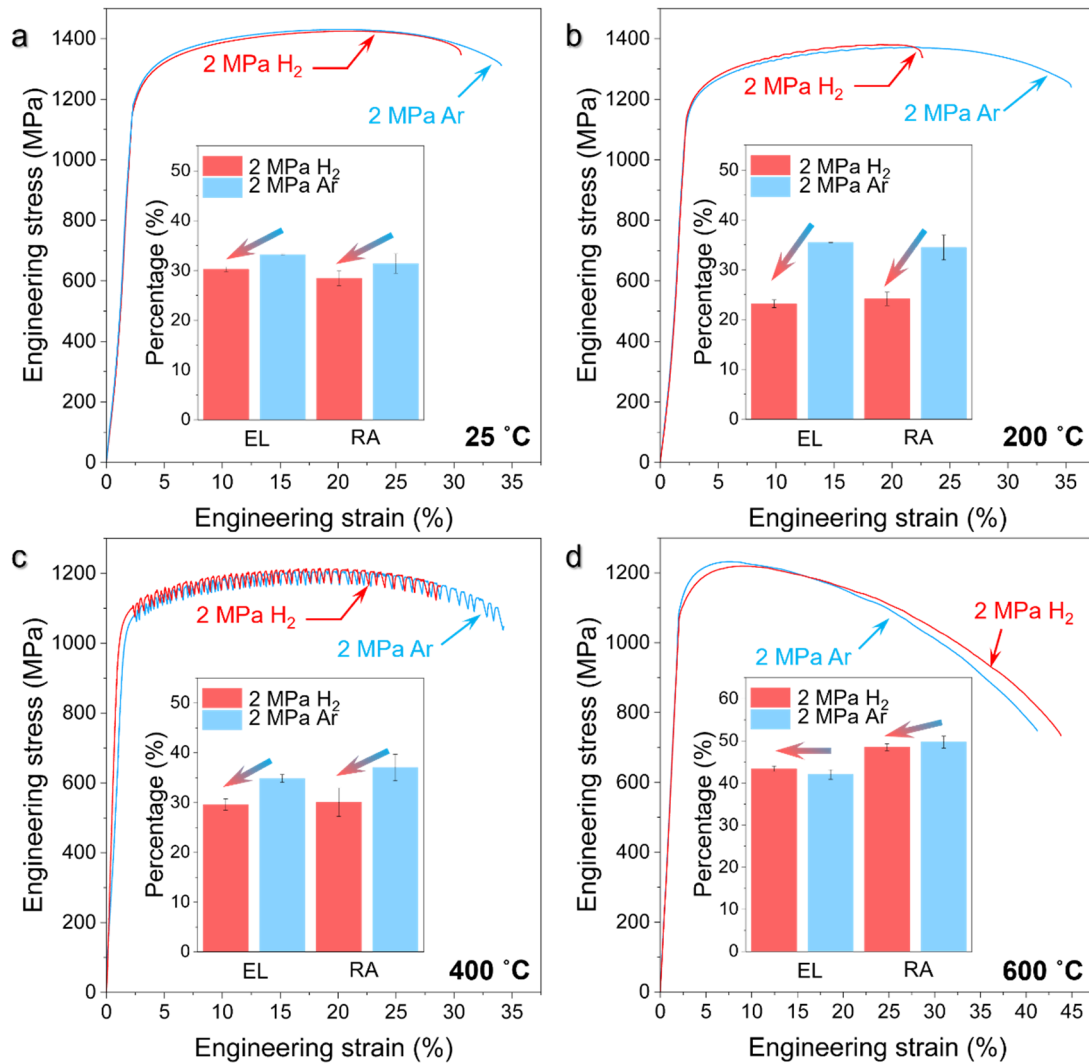

30

31 **Extended Data Fig. 3 | Tensile stress-strain curves of the material loaded under**  
 32 **2 MPa H<sub>2</sub> and Ar at the strain rate of  $\sim 2.9 \times 10^{-5} \text{ s}^{-1}$ . a, 25 °C. b, 200 °C. c, 400 °C.**  
 33 **d, 600 °C.** The curves obtained in Ar atmosphere serve as references to reveal the  
 34 occurrence of H-induced damage and its degradation effect on material's property, the  
 35 total elongation (EL) and reduction in cross-sectional area (RA) values of samples  
 36 loaded under 2 MPa H<sub>2</sub> and Ar are inset in each figure. At low temperatures (25 °C  
 37 and 200 °C, corresponding to the temperature regime I as indicated in Fig. 1d), H  
 38 embrittlement is primarily governed by H-enhanced decohesion (HEDE)<sup>17,18</sup> and/or  
 39 H-enhanced localized plasticity (HELP)<sup>19,20</sup> or adsorption-induced dislocation  
 40 emission (AIDE)<sup>2</sup>. Compared to 25 °C, a more severe reduction in EL and RA was  
 41 observed at 200 °C, attributed to the higher H trapping rate (as illustrated in Fig. 1d of  
 42 the manuscript). At higher temperatures (e.g., 400 °C), the dominant mechanism shifts  
 43 to H-related chemical reaction with carbides. No H-induced degradation effect is  
 44 observed at 600 °C, as the methane formation becomes thermodynamically  
 45 unfavorable (as supported by DFT calculations in Fig. 5d of the manuscript).

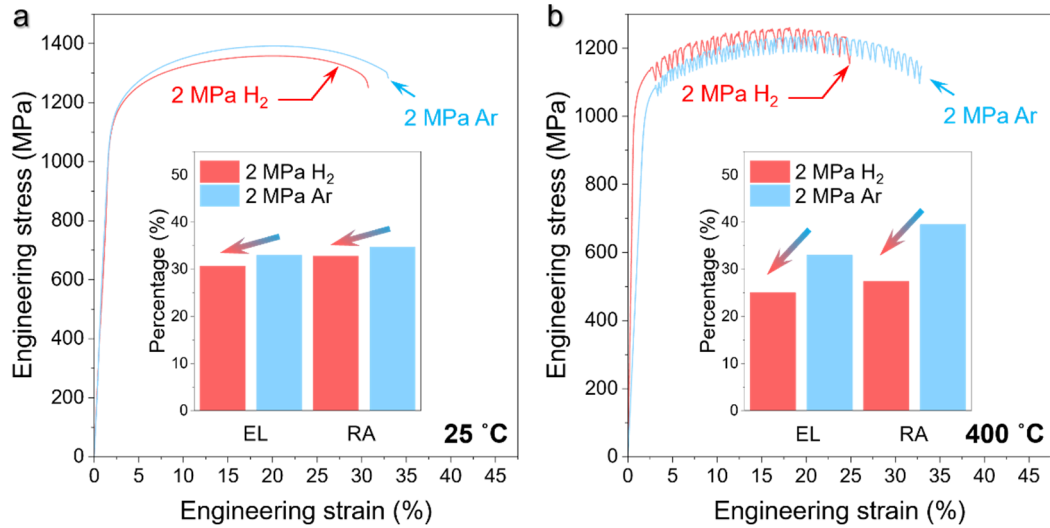

46

47 **Extended Data Fig. 4 | Tensile stress-strain curves of the material loaded under 2**  
 48 **MPa H<sub>2</sub> and Ar at a lower strain rate of  $\sim 1.3 \times 10^{-5} \text{ s}^{-1}$ . a, 25 °C. b, 400 °C.**  
 49 Comparison to the data in Extended Data Fig. 3 shows that a slower strain rate has  
 50 little effect on room-temperature H embrittlement, but induces a markedly stronger H  
 51 embrittlement effect at 400 °C (24.1% of EL reduction at this temperature vs. 6.8% of  
 52 EL reduction at room temperature).

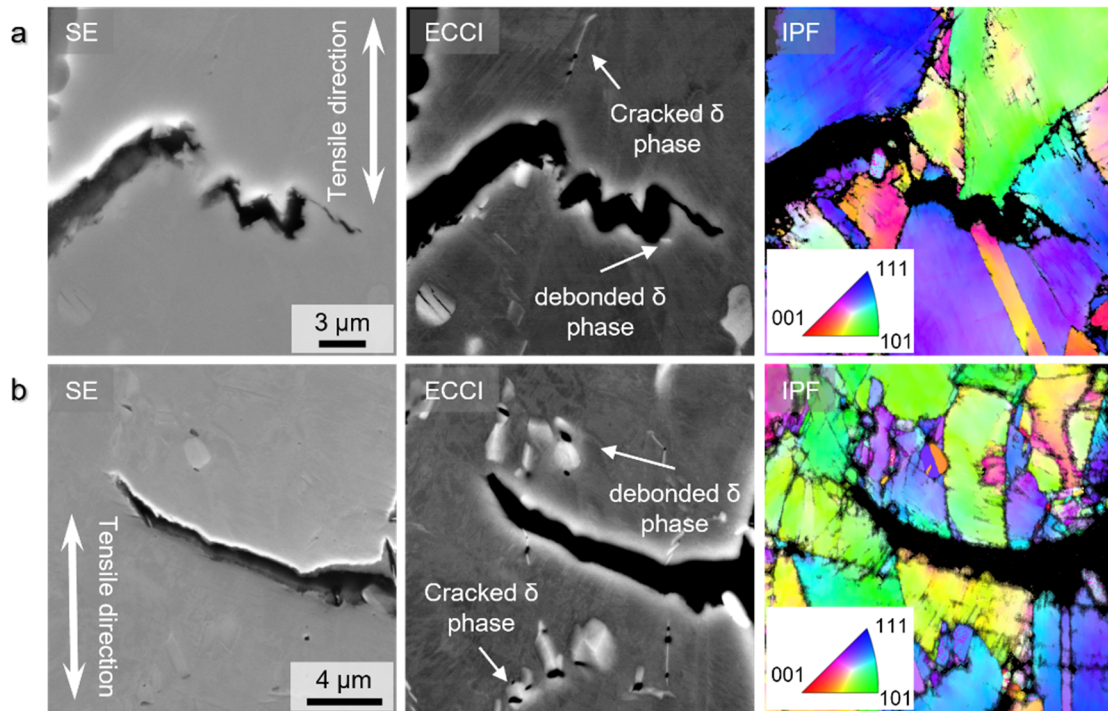

53

54 **Extended Data Fig. 5 | H-induced damage behavior. a, 25 °C. b, 200 °C.** The  
 55 second electron (SE) images show the representative crack morphology and damage  
 56 behavior observed after *in situ* tensile testing under H exposure. Corresponding ECCI  
 57 and EBSD-IPF maps reveal that damages are formed within the  $\delta$  phase or at the  $\delta/\gamma$   
 58 interfaces, which promotes the formation and propagation of intergranular and  
 59 transgranular cracks (corresponding to the damage mechanisms in the temperature  
 60 regime I as indicated in Fig. 1d). Compared with 25 °C, an exacerbated H-induced  
 61 damage associated with  $\delta$  phase is observed at 200 °C, due to higher H trapping rate  
 62 (as described in Fig. 1d).

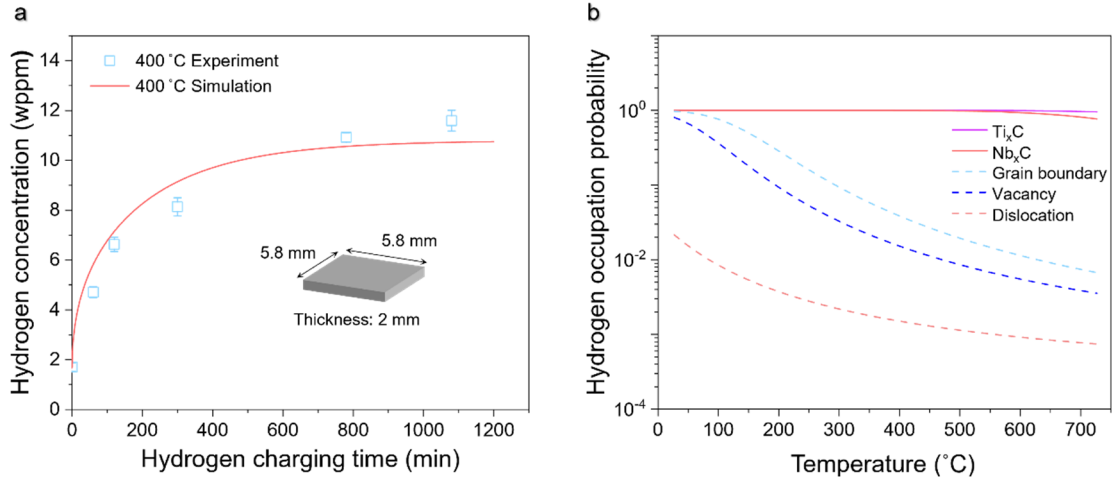

63

64 **Extended Data Fig. 6 | H concentration and temperature dependence of H**  
 65 **occupation probabilities at various defects. a,** Experimentally measured H  
 66 concentration at 400 °C for varying charging times (0, 60, 120, 300, 780 and  
 67 1080 min) and the corresponding diffusion analysis, with H-charging sample  
 68 geometry inset. Post-charging samples were immediately quenched in liquid nitrogen  
 69 following atmosphere venting. The H concentration was measured by hot extraction  
 70 using a LECO ONH836 analyzer (calibrated using steel pin standards containing  
 71 6.9 wppm diffusible H). H diffusion and solubility coefficients were derived by fitting  
 72 numerical simulations (performed using COMSOL Multiphysics software) to the  
 73 experimentally measured H concentration data via minimizing the sum of squared  
 74 errors. The calculated bulk H concentration ( $c_0$ ) for  $\sim 0.5$  h of charging was  
 75 determined to be 4.8 wppm (weight parts per million). Activation energy for diffusion  
 76 ( $Q_1 = -48.63$  kJ/mol) and solution ( $Q_2 = -11.67$  kJ/mol) were implemented in the  
 77 numerical model<sup>62</sup>. The pre-exponential factors were determined to be  
 78  $D_0 = 1.26 \times 10^{-7}$  m<sup>2</sup>/s for diffusion and  $S_0 = 24$  mol/m<sup>3</sup> · MPa<sup>1/2</sup> for solubility,  
 79 respectively. **b,** The occupation probability  $P_i$  of H at defect site  $i$  is calculated using  
 80 the relation  $P_i = 1/[1 + \exp(-E_b^i/k_B T)/c_0]$ , where  $c_0 = 4.8$  wppm,  $E_b^i$  denotes the  
 81 maximum H binding energies at each defect type,  $k_B$  is the Boltzmann constant and  $T$   
 82 is the temperature. Values of  $E_b^i$  for grain boundaries, vacancies, and dislocations are  
 83 adopted from Ref. 11-13.



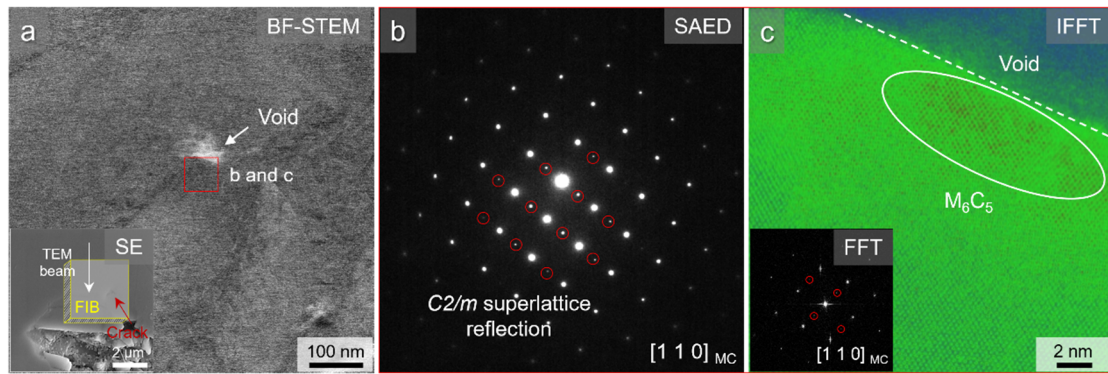

84

85 **Extended Data Fig. 7 | Another transmission electron microscopy (TEM) analysis**  
 86 **of regions close to carbide-matrix interface that are damaged upon mechanical**  
 87 **loading and H<sub>2</sub> exposure at 400 °C.** **a**, The overview bright-field scanning TEM  
 88 (BF-STEM) image of a cracked carbide-matrix interface, with a SE inset showing the  
 89 corresponding FIB-lifted area. **b**, Selected area electron diffraction (SAED) pattern  
 90 taken from the rectangular frame in **a**, showing again superlattice spots that  
 91 correspond well to the vacancy-ordered M<sub>6</sub>C<sub>5</sub>-type carbide (*C2/m* space group). **(C)**  
 92 Inversed Fast Fourier Transformation (IFFT) image based on the superlattice  
 93 reflection spots marked in the inset Fast Fourier Transformation (FFT) image taken  
 94 from the rectangular frame in **a**, revealing the formation of M<sub>6</sub>C<sub>5</sub>-type carbide close to  
 95 the carbide-matrix interfacial void. A probe current (*I<sub>p</sub>*) of ~7 pA for BF-STEM and  
 96 SAED imaging and of 3 pA for HAADF-STEM imaging were used to prevent any  
 97 possible electron beam damage to the beam-sensitive newly formed carbide.

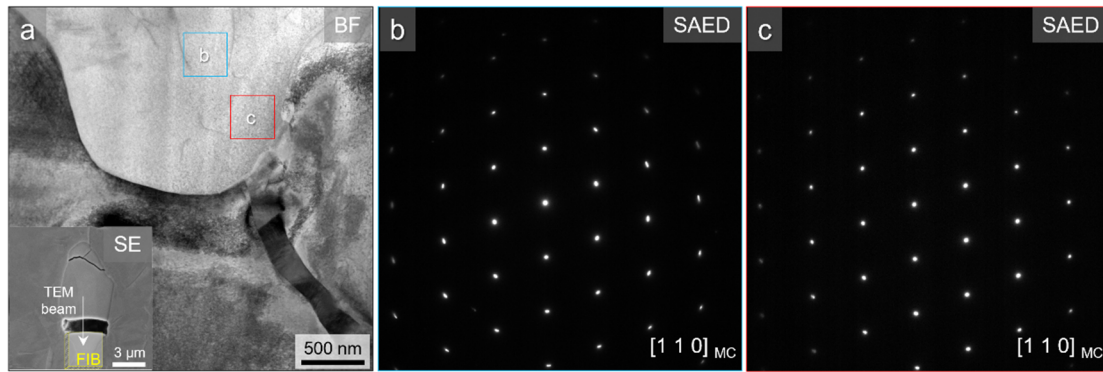

98

99

100

101

102

103

104

**Extended Data Fig. 8 | TEM analysis of regions close to carbide-matrix interface after mechanical loading under Ar atmosphere at 400 °C. a,** The overview TEM bright field (BF) image, with a SE inset showing the corresponding FIB-lifted area. **b.c,** SAED patterns acquired from regions indicated by the blue and red rectangle frame marked in **a,** respectively. The MC carbide maintains its initial FCC (B1) structure with no superlattice structure observed.

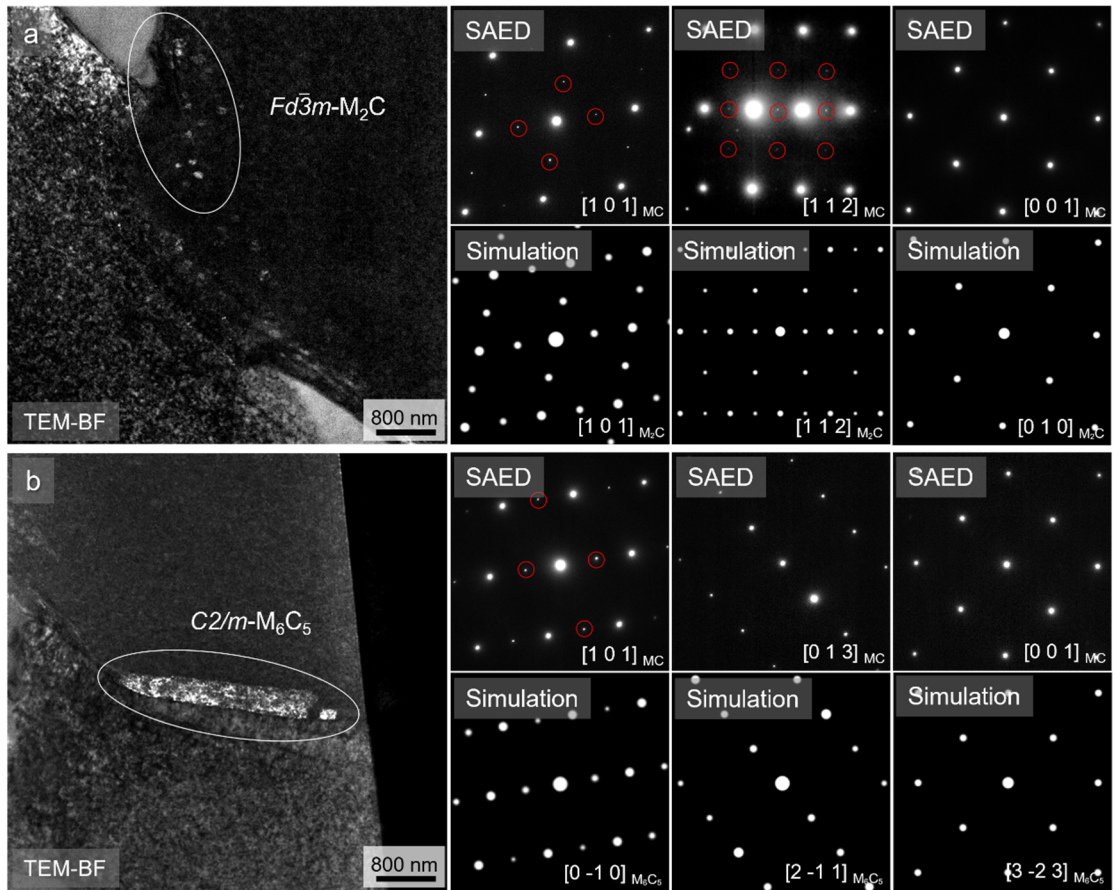

105

106

107

108

109

110

**Extended Data Fig. 9 | TEM dark-field (DF) image, experimental and simulated SAED patterns for carbide phases. a,  $M_2C$ . b,  $M_6C_5$ .** Experimental SAED patterns were acquired from various zone axes and compared with simulations performed using CrysTBox software<sup>63</sup>, the red circles mark the superlattice diffraction spots corresponding to the DF images.

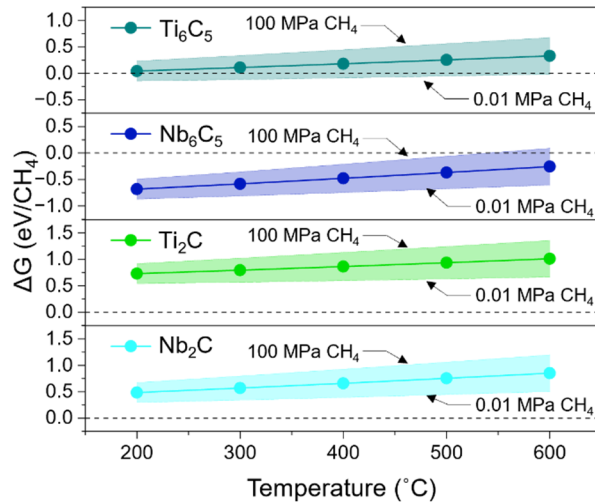

111

112 **Extended Data Fig. 10 | Thermodynamics of H-carbide interaction without H**  
 113 **uptake in C vacancies within carbides.** Gibbs free energy change ( $\Delta G$ ) for the H-  
 114 induced formation of  $\text{CH}_4$  and vacancy-ordered carbides without H occupation,  
 115 calculated at a fixed  $\text{H}_2$  partial pressure of 2 MPa and varying  $\text{CH}_4$  pressures (the  
 116 point-line represents 1 MPa  $\text{CH}_4$ , shaded zone represents 0.01–100 MPa  $\text{CH}_4$ ). The  
 117  $\Delta G$  was evaluated considering the reaction:  $2(1-x) + \text{MC} \rightarrow \text{MC}_x + (1-x)\text{CH}_4$ . This  
 118 reaction is thermodynamically less favorable ( $\Delta G > 0$  for most modelling scenarios)  
 119 in the absence of H uptake in C vacancies, compared to the DFT calculations shown  
 120 in Fig. 5d of the manuscript.



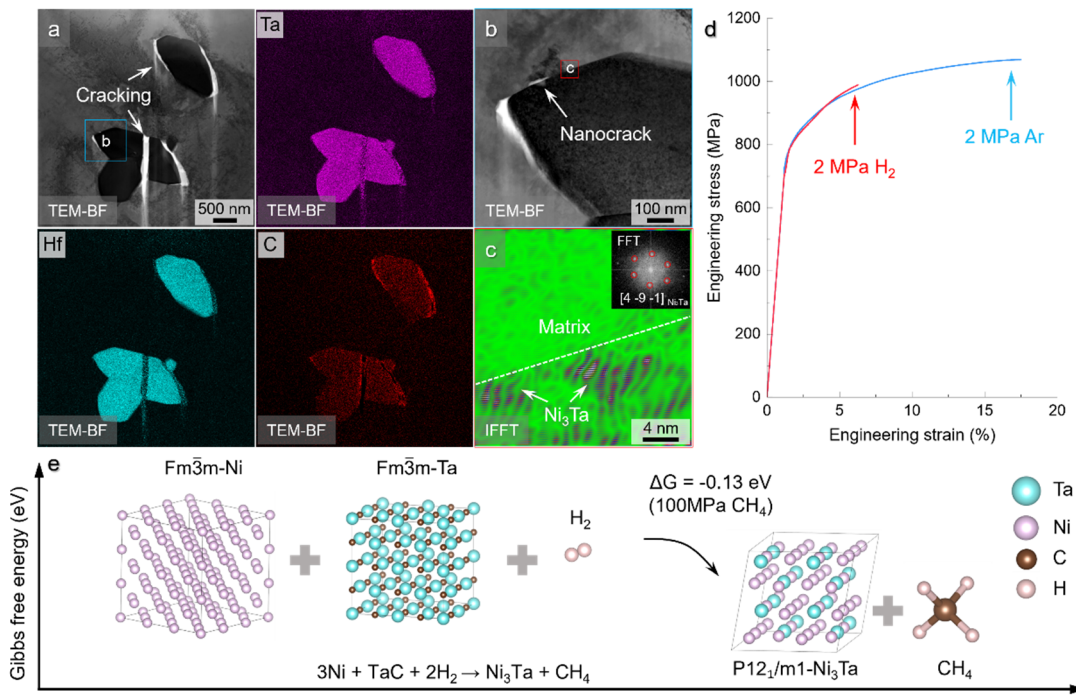

121

122 **Extended Data Fig. 11 | H-induced damage behavior for directionally solidified**  
 123 **CM247LC Ni-based alloy and DFT calculation of H-carbide interaction at**  
 124 **600 °C. a,** The overview TEM-BF image and the corresponding TEM-EDX mapping of cracked (Ta,Hf)C carbides of the sample failed in H atmosphere. **b,** TEM-BF image  
 126 taken from the blue rectangle frame marked in **a**, showing the cracked carbide-matrix  
 127 interface and an adjacent nanocrack. **c,** IFFT image based on the reflection spots  
 128 marked in the inset FFT image, which is taken from the red rectangle frame marked in  
 129 **b**, suggesting the formation of  $\text{Ni}_3\text{Ta}$  phase (P12<sub>1</sub>/m1 space group) due to the presence  
 130 of H. **d,** Tensile stress-strain curves of the material loaded under 2 MPa  $\text{H}_2$  and Ar at  
 131 600 °C. The H-induced degradation in tensile elongation is due to the facile carbide  
 132 debonding induced by H and the associated reactions. **e,** Thermodynamic feasibility  
 133 of the chemical reaction shown in the figure at 600 °C with 2 MPa  $\text{H}_2$  and 100 MPa  
 134  $\text{CH}_4$ . The Gibbs free energy calculation (using the same procedures and DFT  
 135 parameters in the main text) shows that this reaction is favorable at 600 °C. These  
 136 findings demonstrate that the proposed high-temperature H embrittlement mechanism  
 137 can be applied to other alloys, independent of carbide type or temperature regime.
